## Unconventional Views of Frailty

### Review Article

# Frailty in Relation to the Accumulation of Deficits

Kenneth Rockwood<sup>1,2</sup> and Arnold Mitnitski<sup>2</sup>

<sup>1</sup>Division of Geriatric Medicine, <sup>2</sup>Department of Medicine, Dalhousie University, Halifax, Nova Scotia, Canada.

This review article summarizes how frailty can be considered in relation to deficit accumulation. Recalling that frailty is an age-associated, nonspecific vulnerability, we consider symptoms, signs, diseases, and disabilities as deficits, which are combined in a frailty index. An individual's frailty index score reflects the proportion of potential deficits present in that person, and indicates the likelihood that frailty is present. Although based on a simple count, the frailty index shows several interesting properties, including a characteristic rate of accumulation, a submaximal limit, and characteristic changes with age in its distribution. The frailty index, as a state variable, is able to quantitatively summarize vulnerability. Future studies include the application of network analyses and stochastic analytical techniques to the evaluation of the frailty index and the description of other state variables in relation to frailty.

**F**RAILITY is a nonspecific state of increasing risk, which reflects multisystem physiological change. It is highly age-associated. The physiological changes that underlie frailty do not always achieve disease status, so that some people, usually very elderly, are frail without having life-threatening illness. These statements about frailty are relatively noncontroversial. More controversial is how to operationalize frailty in clinical practice and for research (1–6). We and others have done so by considering frailty in relation to the accumulation of deficits (7–12). Here, we review how studying deficit accumulation can help elucidate frailty, its relation to aging, and its mechanisms. We focus on mathematical and clinical aspects.

#### BACKGROUND

The frailty index score is calculated as the proportion of potential deficits that are present in a given individual, as elaborated below. The frailty index recognizes that frailty is multifactorial and dynamic (13,14). We first tried to define frailty by combining integrated items—and traditional foci of gerontologists—such as cognition, mobility, continence, and function (14). Although this gave good construct (15) and predictive validity (14,16), it left much variance unexplained, and did not consider relative fitness. We aimed for a measure that could evaluate impairments in many systems, accommodate change, was graded, and was conceptually simple. By combining items in a single index, we can consider frailty in absolute and relative terms, according to this probabilistic consideration: The more things individuals have wrong with them, the higher the likelihood that they will be frail. We now consider each part of that statement.

What should be counted as “things that individuals have wrong with them”? We consider symptoms, signs, disabilities, diseases, and laboratory measurements, which we

term *deficits*. The frailty index uses a range of deficits that are readily available in survey or clinical data. (Examples are available at: <http://myweb.dal.ca/amitnits/STable.htm>.) A standard Comprehensive Geriatric Assessment (CGA) (17), for example, records about 40 items, some of which are self-reported (e.g., “how would you rate your health”), others ascertained by tests [e.g., Mini-Mental State Examination (18)], and still others by clinical evaluation (e.g., congestive heart failure) or laboratory measurement (diabetes mellitus). These can be combined by simply adding them—for example, a 1 for each deficit that is present, a 0 when they are absent, and a fraction when they are present to a limited extent (e.g., health as good = 0, fair = 0.5, poor = 1) (19,20). Obviously, there are many ways to count, for example, 10 deficits from a total of 40, but as illustrated below, the resulting index score ( $10/40 = 0.25$ ) has many characteristic features, even if the composition is not the same between individuals. Whereas it is understandable to be concerned about the specific nature of the variables that might be included in the frailty index, our experience suggests that, when some sufficiently large number (roughly, about 40) variables are considered, the variables can be selected *at random*, and still yield comparable results of the risks of adverse outcomes (21).

What we mean by “the higher the likelihood that they will be frail” is a greater risk of adverse outcomes (e.g., death, institutionalization, health services use, further deficit accumulation). Still, we note that frailty is neither necessary for death (even very fit people can die unexpectedly, as in an accident) nor is it sufficient (even at the highest level of the frailty index, the median survival time is  $> 1$  year). Moreover, although death is individual, the mortality rate is a group statistic, so our inquiries are necessarily probabilistic. Furthermore, we are not concerned about mortality

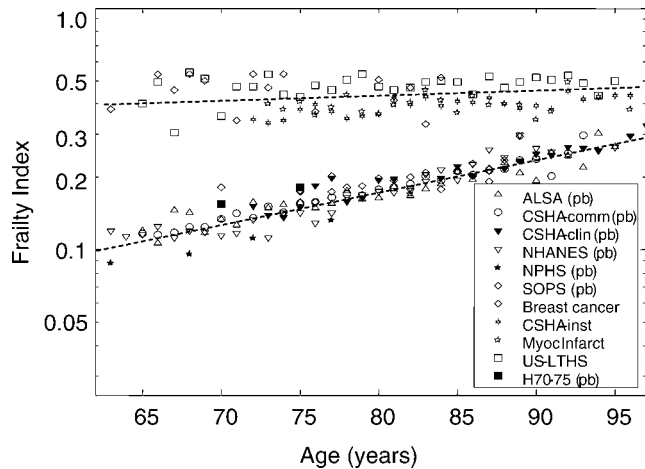

Figure 1. Relationship between the frailty index and chronological age for seven population-based (pb), community-dwelling samples ( $n = 33,581$ ) (ALSA [Australian Longitudinal Study of Aging], CSHA-screen [Canadian Study of Health and Aging screening sample], CSHA-exam [clinical examination sample, H-70, Gothenburg study, Sweden], NPHS [National Population Health Survey, Canada], NHANES [National Health and Nutrition Examination Survey, United States], and SOPS [Sydney Old Persons Study, Australia] and 2573 people from two institutional (CSHA-inst CSHA wave 1 institutionalized sample; US-LTHS—inst National Long Term Care Survey, United States) and two clinical studies (Breast cancer [cohort of metastatic breast cancer survivors, Canada] and MyocInfarct [Improving Cardiovascular Outcomes of Nova Scotians; ICONS, Canada]). Lines show the regression of mean frailty index with age. For community-dwelling people, the line parameters are: slope = 0.029 (95% confidence interval = 0.0267, 0.0301) and intercept =  $-4.012$  ( $-3.872$ ,  $-4.142$ ) [from Mitnitski et al. (24)].

prediction; instead, mortality prediction has served as a means of validating the concept. Were our focus mortality prediction, we would have given heavy weight to chronological age, or diseases of known lethality, such as late-life cancer (22). Rather, we view frailty such that chronological age can be understood as a contextual factor—for example, as providing an expected value for deficit accumulation. Our model suggests that the effect of chronological age on adverse outcomes can be negligible when deficits are taken into account (20,21,23,24).

Still, apparent intuitiveness would be no advantage if it gave unintelligible or trivial results, but the self-evident statement that people with more things wrong are more likely to suffer an adverse event is quantifiable with the frailty index, and manipulating the resulting data gives rise to insights (including hints of mechanisms) that are not self-evident. Before considering these mathematical aspects, we first summarize some essential features. On average, deficits accrue at a characteristic rate. In elderly people from four developed countries, the mean rate of deficit accumulation across ages was close to 0.03 (observed range 0.02–0.04) per year on a log scale (Figure 1) (24). Note that the samples differed not just by country, but were collected up to 20 years apart and used different variables (e.g., self-report, clinically assessed, laboratory measures). Moreover, the frailty indices used different numbers of variables (from <30 to 70). The only restrictions on variables we used were that they reflected deficits (cf. attributes—e.g., such as eye

color) accumulated across ages, and had <5% missing values. Although a recent Chinese estimate put the rate of deficit lower (at about 1.4%) (8), this appears to reflect a survivor effect after age 87 years. By contrast, the frailty index has otherwise correlated very highly (typically > 0.96) with age (12,24,25). In addition, women accumulate more deficits than men do, even though, for any given level of deficits, men have the higher mortality rates (8–12,24). In contrast to community dwelling people, in the institutional and clinical cohorts, the frailty index was high at all ages, and thus showed no relationship to age, consistent with high levels of frailty in those settings (24).

## MATHEMATICAL EXPLORATIONS IN RELATION TO MECHANISMS

The frailty index approach has a certain similarity to other quantitative approaches. Vaupel and colleagues (26) proposed that a largely undefined “frailty” could account for heterogeneity in health status to explain mortality outcomes (26). The origin of this frailty was hypothesized to come from genetic differences, and this was addressed in a mathematical model incorporating the pleiotropy of several genes (27).

Our approach of quantifying deficit accumulation yields some understanding of the vulnerability of both individuals and groups. For example, the distribution of the index shows both characteristic changes with age (28) and a limit that does not depend on age (29). Here, however, we focus on two findings that hint at biological mechanisms: changes in the heterogeneity of health with age and transitions between health states. The average rate of deficit accumulation increases monotonically with age, as does the standard deviation, underlying the generally accepted contention that, with age, health status becomes more variable. Importantly, however, only *absolute* heterogeneity in health status (e.g., as measured by the variance) increases with age. Relative heterogeneity decreases with age, as illustrated by the coefficient of variation, which is the ratio of the standard deviation to the mean. We have found that the coefficient of variation of the frailty index consistently decreases with age (Figure 2) (28,30).

The decrease with age in the coefficient of variation has theoretical implications. Ashby’s theory of “requisite variety” (31,32) suggests that, if the number of insults faced by an organism overwhelms the number of responses that it can mount, the system will fail. Therefore it is reasonable to expect that, as systems age, they lose variety in their response repertoires, here captured, at the group level, by the coefficient of variation. Furthermore, a simple stochastic process of deficit accumulation yields a power-law relationship between the mean frailty index  $m$  and its coefficient of variation,  $v \sim m^{-1/2}$  (30). The same exponent  $1/2$  has also been found in the relationship between the average flux in complex networks, and its fluctuations as measured by its standard deviation (33). Consistent with the exponent representing influences external to the network, we interpret this to mean that large environmental effects—for example, cohort effects—become less important closer to the end of life, where more proximate effects dominate. In consequence, at extreme old age, people become more susceptible to smaller

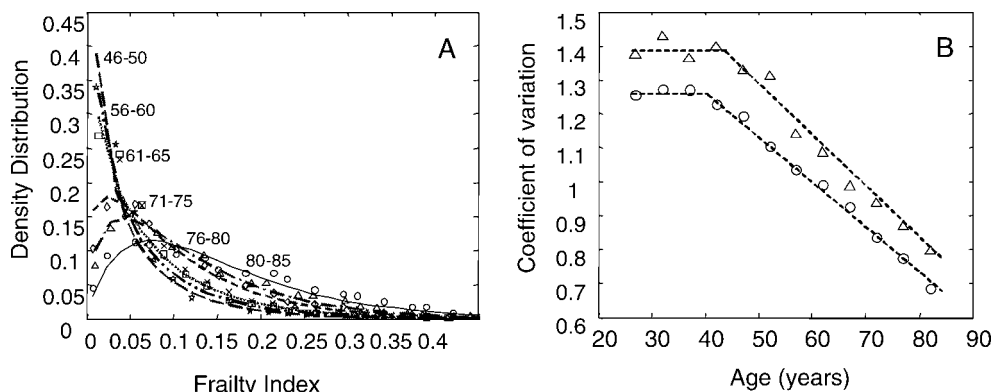

Figure 2. Changes with age in the frailty index. **A**, Change in the shape of the distribution, both sexes. **B**, Change in the coefficient of variation separately in men (triangles) and women (circles) [from Rockwood et al. (28)].

perturbations. That the coefficient of variation itself can be summarized in network analyses is of considerable interest, and is motivating further inquiries by our group.

Aging involves many interacting processes, in which stochastic components play a key role—even in genetically identical twins raised in a constant environment (34). With aging, damage accumulates in cells and tissues, whether by random (35) or genetic (36) mechanisms, involving sub-cellular and organ-specific pathways (37). Each results in declines in functional capacity (38,39) and redundancy exhaustion (40). Our modeling (23) reveals stochastic mechanisms and opens the prospect of using powerful analytical

techniques derived from the theory of stochastic processes (41). A modified Poisson model with two nontrivial parameters gives a unified description of transitions to worse health states, health improvements, and mortality. The probability of transitions between  $n$  (at baseline) and  $k$  deficits can be expressed as the following:

$$P_{nk} = \frac{\rho_n^k}{k!} \exp(-\rho_n)(1 - P_{nd}),$$

where  $P_{nd}$  is the probability to die during the time between two consecutive assessments,  $\rho_n = \rho_0 + b_1 n$ , and  $P_{nd} = P_{0d}$

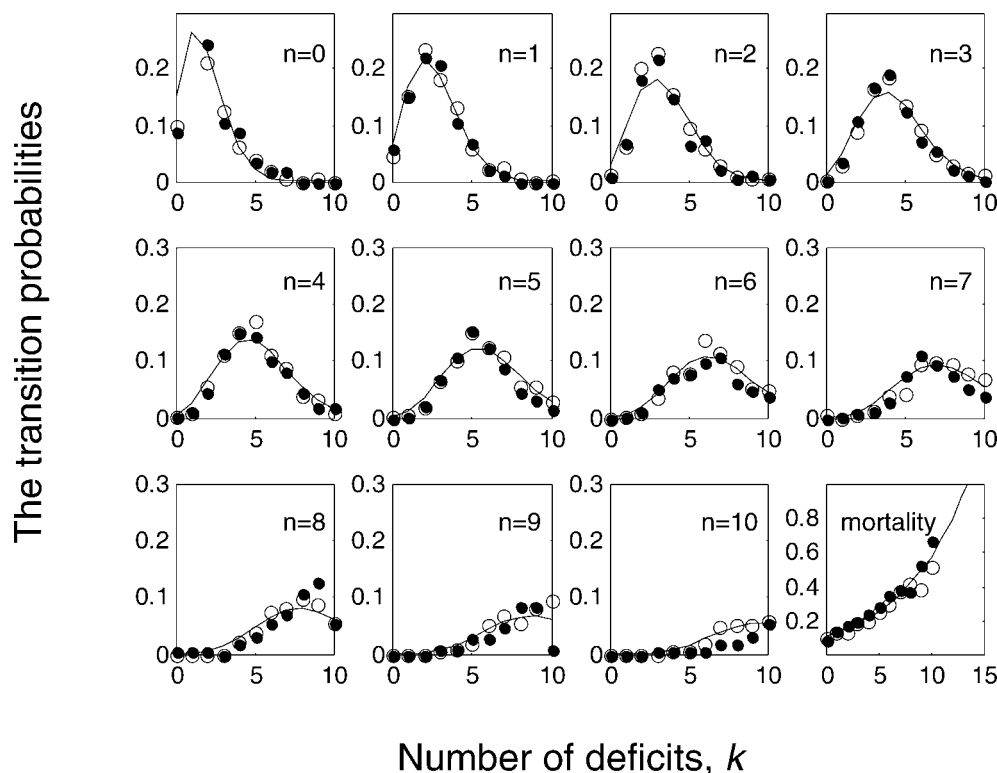

Figure 3. The probability of transition from  $n$  to  $k$  deficits, and to death (bottom right) in relation to the starting  $n$  deficits. Observational data of transitions from Canadian Study of Health and Aging (CSHA)-1 to CSHA-2 (filled circles) and from CSHA-2 to CSHA-3 (open circles). Estimates are presented for the model that combines transitions from CSHA-1 to CSHA-2 and from CSHA-2 to CSHA-3 [from Mitnitski et al. (23)].

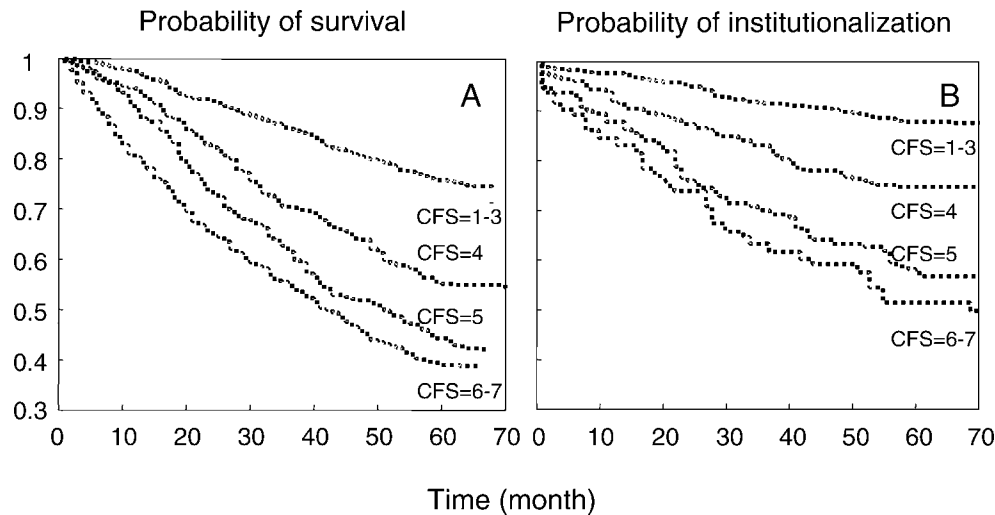

Figure 4. **A**, Kaplan-Meier medium-term survival curves (adjusted for age and sex) for individuals with different values of the Canadian Study of Health and Aging (CSHA) Clinical Frailty Scale (CFS). The number of people at the start of each group:  $n = 952$  for CFS = 1–3;  $n = 349$  for CFS = 4;  $n = 305$  for CFS = 5;  $n = 691$  for CFS = 6–7. **B**, Kaplan-Meier medium-term institutionalization curves (adjusted for age and sex) for individuals with different values of the Clinical Global Frailty Scale. The number of people at the start of each group:  $n = 828$  for CFS = 1–3;  $n = 256$  for CFS = 4;  $n = 136$  for CFS = 5;  $n = 66$  for CFS = 6–7 [from Rockwood et al. (16)].

$\exp(b_2n)$ ;  $p_0$  and  $P_{0d}$  are the baseline characteristics. The two parameters  $b_1$  and  $b_2$  describe, respectively (given the current number of deficits), the increments of their expected change, and the risk of death (23). The very high model fit ( $R = 0.99$ ) (Figure 3) with so few parameters has encouraged additional inquiries. The simple stochastic multistage model shows not only deficit accumulation but also its flip side. It shows that improvement is also possible and not so rare (roughly one third of the sample showed some degree of improvement in 5 years). Still, the likelihood of death increases exponentially with the number of deficits; therefore, in the long run, the negatives outweigh the positives.

#### CLINICAL UTILITY OF FRAILITY INDEX MEASURES

Few clinicians would doubt that the more things that people have wrong with them, the frailer they will be, but few too would embrace a 70-item scale. For now, we have itemized the elements of a standard CGA to produce an FI-CGA (20,21). The FI-CGA has the usual properties of other versions—that is, it is highly correlated with age, shows a  $\gamma$  distribution, is higher in women, and correlates with several adverse outcomes, including institutionalization and health care use (Figure 4). If further cross-validated, an FI-CGA could aid clinical decision-making by indicating the degree of frailty, and thus the likelihood of an adverse outcome.

The FI-CGA, like other versions of the frailty index [including the widely used 5-item phenotype definition (42)] largely weights items equally. It might seem obvious to apply differential weights to the variables, so that cancer, for example, would be weighted more heavily than skin disease. Although in individual samples the performance of the index (e.g., in predicting death) can be improved by weighting (43), in general, weighting limits generalizability. For now, generalizability appears to have the greatest value;

therefore we have pursued studies without weighting. Still, studies that might aid clinical decision-making (for example, by demonstrating how closely an individual has approached the theoretical limit of frailty) will require scrupulous attention to whether the price paid in precision is too high for the rewards in generalizability. Alternately, other groups might cross-validate an unweighted frailty index but use weighting for local use. Whether there are demonstrable levels or severity classes also needs careful investigation (16,44).

#### FUTURE DIRECTIONS

In addition to studies that further explore the frailty index's mathematical properties, evaluate the limit to frailty, locally cross-validate weighted and unweighted clinical versions, and investigate grades, we see other uses of the frailty index approach. We are keen that insights on frailty can translate into pragmatic techniques for geriatricians (45). Clearly, the frailty index does not define a syndrome, which is a collection of specific symptoms and signs. Instead, the frailty index can be considered as a state variable, in that it characterizes the whole health of individuals and validly classifies risk across a wide range of people (7,46). This does not contradict the idea of a syndrome; indeed, it should be the case that people classified as frail syndromically will have higher frailty index values than those who do not.

If the frailty index can be considered as a state variable, perhaps there are others. In our view, attention and concentration, function, and mobility and balance all seem to be logical candidates, as they are evolutionarily high order and integrate many pathways. Mobility and balance especially seem to have merit in the acute care setting, where they fluctuate with changes in an individual's overall state of health, can readily be tracked, have plain language descriptors, and are susceptible to quantification (47). Perhaps



the most ambitious application of the frailty index is as a means of summarizing the commonly invoked (but less commonly quantified) concept of biological age (7,8,12,48–50). Such studies might best be situated within the idea of biomarkers, and could thereby benefit from the considerable experience of those inquiries (51–53). For now, the evaluation of deficit accumulation index points out how we can embrace the complexity of frailty.

#### ACKNOWLEDGMENTS

Kenneth Rockwood receives career support from the Dalhousie Medical Research Foundation as the Kathryn Allen Weldon Professor of Alzheimer Research. Some of the analyses included in this review were conducted with CIHR support through grants MOP-62823 (Principal Investigator [PI], K.R.) and MOP-64169 (PI: A.M.).

The authors assert no proprietary interest in this work.

#### CORRESPONDENCE

Address correspondence to Kenneth Rockwood, MD, Centre for Health Care of the Elderly, 1421-5955 Veterans' Memorial Lane, Halifax, Nova Scotia, Canada, B3H 2E1. E-mail: Kenneth.Rockwood@Dal.ca

#### REFERENCES

- Hogan DB, MacKnight C, Bergman H; Steering Committee, Canadian Initiative on Frailty and Aging. Models, definitions, and criteria of frailty. *Aging Clin Exp Res*. 2003;15(3 Suppl):1–29.
- Ferrucci L, Guralnik JM, Studenski S, Fried LP, Cutler GB Jr, Walston JD; Interventions on Frailty Working Group. Designing randomized, controlled trials aimed at preventing or delaying functional decline and disability in frail, older persons: a consensus report. *J Am Geriatr Soc*. 2004;52:625–634.
- Fried L, Ferrucci L, Darer J, Williamson J, Anderson G. Untangling the concepts of disability, frailty, and comorbidity: implications for improved targeting and care. *J Gerontol A Biol Sci Med Sci*. 2004;59A:255–263.
- Fisher AL. Just what defines frailty? *J Am Geriatr Soc*. 2005;53:2229–2230.
- Rockwood K. What would make a definition of frailty successful? *Age Ageing*. 2005;34:432–434.
- Rockwood K. Frailty and its definition: a worthy challenge. *J Am Geriatr Soc*. 2005;53:1069–1070.
- Mitnitski A, Mogilner A, Rockwood K. Accumulation of deficits as a proxy measure of aging. *ScientificWorld Journal*. 2001;1:323–336.
- Goggins WB, Woo J, Sham A, Ho SC. Frailty index as a measure of personal biological age in a Chinese population. *J Gerontol A Biol Sci Med Sci*. 2005;60A:1046–1051.
- Woo J, Goggins W, Sham A, Ho SC. Social determinants of frailty. *Gerontology*. 2005;51:402–408.
- Woo J, Goggins W, Sham A, Ho SC. Public health significance of the frailty index. *Disabil Rehabil*. 2006;28:515–521.
- Kulminski A, Yashin A, Ukraintseva S, et al. Accumulation of health disorders as a systemic measure of aging: findings from the NLTC data. *Mech Ageing Dev*. 2006;127:840–848.
- Kulminski A, Yashin A, Arbeev K, et al. Cumulative index of health disorders as an indicator of aging-associated processes in the elderly: results from analyses of the National Long Term Care Survey. *Mech Ageing Dev*. 2007;128:250–258.
- Rockwood K, Fox RA, Stolee P, Robertson D, Beattie BL. Frailty in elderly people: an evolving concept. *CMAJ*. 1994;150:489–495.
- Rockwood K, Stolee P, McDowell I. Factors associated with institutionalization of older people in Canada: testing a multifactorial definition of frailty. *J Am Geriatr Soc*. 1996;44:578–582.
- Rockwood K, Stadnyk K, MacKnight C, McDowell I, Hébert R, Hogan DB. A brief clinical measure of frailty. *Lancet*. 1999;353:205–206.
- Rockwood K, Song X, MacKnight C, et al. A global clinical measure of fitness and frailty in elderly people. *CMAJ*. 2005;173:489–495.
- Rockwood K, Silvis JL, Fox RA. A standard Comprehensive Geriatric Assessment: helping your elderly patients maintain functional well-being. *Postgrad Med*. 1998;103:247–264.
- Folstein MF, Folstein SE, McHugh PR. “Mini-mental state”. A practical method for grading the cognitive state of patients for the clinician. *J Psychiatr Res*. 1975;12:189–198.
- Jones DM, Song X, Rockwood K. Operationalizing a frailty index from standardized comprehensive geriatric assessment. *J Am Geriatr Soc*. 2004;52:1929–1233.
- Jones D, Song X, Mitnitski A, Rockwood K. Evaluation of a frailty index based on a comprehensive geriatric assessment in a population based study of elderly Canadians. *Aging Clin Exp Res*. 2005;17:465–471.
- Rockwood K, Mitnitski A, Song X, Steen B, Skoog I. Long-term risks of death and institutionalization of elderly people in relation to deficit accumulation at age 70. *J Am Geriatr Soc*. 2006;54:975–979.
- Lee SJ, Lindquist K, Segal MR, Covinsky KE. Development and validation of a prognostic index for 4-year mortality in older adults. *JAMA*. 2006;295:801–808.
- Mitnitski AB, Bao L, Rockwood K. Going from bad to worse: a stochastic model of transitions in deficit accumulation, in relation to mortality. *Mech Ageing Dev*. 2006;127:490–493.
- Mitnitski A, Song X, Skoog I, et al. Relative fitness and frailty of elderly men and women in developed countries, in relation to mortality. *J Am Geriatr Soc*. 2005;53:2184–2189.
- Mitnitski AB, Mogilner AJ, MacKnight C, Rockwood K. The mortality rate as a function of accumulated deficits in a frailty index. *Mech Ageing Dev*. 2002;123:1459–1462.
- Vaupel JW, Manton KG, Stallard E. The impact of heterogeneity in individual frailty on the dynamics of mortality. *Demography*. 1979;9:439–454.
- Yashin AI, Ukraintseva SV, De Benedictis G, et al. Have the oldest old adults ever been frail in the past? A hypothesis that explains modern trends in survival. *J Gerontol Med Sci*. 2001;56A:B432–B442.
- Rockwood K, Mogilner AJ, Mitnitski A. Changes with age in the distribution of a frailty index. *Mech Ageing Dev*. 2004;125:517–519.
- Rockwood K, Mitnitski A. Limit to deficit accumulation in elderly people. *Mech Ageing Dev*. 2006;127:494–496.
- Mitnitski A, Rockwood K. Decrease in the relative heterogeneity of health with age: a cross-national comparison. *Mech Ageing Dev*. 2006;127:70–72.
- Ashby WR. *An Introduction to Cybernetics*. London: Chapman & Hall Ltd.; 1952:295.
- Thaler DS. Design for an aging brain. *Neurobiol Aging*. 2002;23:13–15.
- Argollo de Menezes M, Barabasi AL. Separating internal and external dynamics of complex systems. *Phys Rev Lett*. 2004;93:068701.
- Kirkwood TB, Feder M, Finch CE, et al. What accounts for the wide variation in life span of genetically identical organisms reared in a constant environment? *Mech Ageing Dev*. 2005;126:439–443.
- Kirkwood TB. Understanding the odd science of aging. *Cell*. 2005;120:437–447.
- Boehm M, Slack F. A developmental timing microRNA and its target regulate life span in *C. elegans*. *Science*. 2005;310:1954–1957.
- Taylor RW, Barron MJ, Borthwick GM, et al. Mitochondrial DNA mutations in human colonic crypt stem cells. *J Clin Invest*. 2003;112:1351–1360.
- Shock NW. Age changes in some physiological processes. *Geriatrics*. 1957;12:40–48.
- Strehler BL, Mildvan AS. A general theory of mortality and aging. *Science*. 1960;132:14–21.
- Gavrilov LA, Gavrilova NS. The reliability theory of aging and longevity. *J Theor Biol*. 2001;213:527–545.

41. Bharucha-Reid AT. *Elements of the Theory of Markov Processes and their Applications*. McGraw-Hill Series in Probability and Statistics. New York: McGraw-Hill Book Co., Inc.; 1960.
42. Fried LP, Tangen CM, Walston J, et al. Frailty in older adults: evidence for a phenotype. *J Gerontol Med Sci*. 2001;56A:M146–M156.
43. Song X, Mitnitski A, MacKnight C, Rockwood K. Assessment of individual risk of death using self-report data: an artificial neural network compared to a frailty index. *J Am Geriatr Soc*. 2004;52:1180–1184.
44. Bandeen-Roche K, Xue QL, Ferrucci L, et al. Phenotype of frailty: characterization in the Women's Health and Aging Study. *J Gerontol A Biol Sci Med Sci*. 2006;61A:262–266.
45. Ferrucci L, Mahallati A, Simonsick EM, Frailty and foolishness of Eos. *J Gerontol A Biol Sci Med Sci*. 2006;61A:260–261.
46. Mitnitski AB, Rockwood K. Help available—phenomenological models for research on aging. *Sci Aging Knowledge Environ*. 2003; vp2. Available at: <http://sageke.sciencemag.org/cgi/content/full/sageke/2003/12/vp2>.
47. MacKnight C, Rockwood K. Rasch analysis of the hierarchical assessment of balance and mobility (HABAM). *J Clin Epidemiol*. 2000;53:1242–1247.
48. Mitnitski AB, Graham JE, Mogilner AJ, Rockwood K. Frailty, fitness and late-life mortality in relation to chronological and biological age. *BMC Geriatr*. 2002;2:1.
49. Karasik D, Demissie S, Cupples LA, Kiel DP. Disentangling the genetic determinants of human aging: biological age as an alternative to the use of survival measures. *J Gerontol A Biol Sci Med Sci*. 2005;60A:574–587.
50. Warner HR. Current status of efforts to measure and modulate the biological rate of aging. *J Gerontol A Biol Sci Med Sci*. 2004;59A: 692–696.
51. Butler RN, Sprott R, Warner H, et al. Biomarkers of aging: from primitive organisms to humans. *J Gerontol A Biol Sci Med Sci*. 2004;59A:560–567.
52. Weale RA. A note on age-related biomarkers. *J Gerontol A Biol Sci Med Sci*. 2005;60A:35–38.
53. Parentini I, Cavallini G, Donati A, Gori Z, Bergamini E. Accumulation of dolichol in older tissues satisfies the proposed criteria to be qualified a biomarker of aging. *J Gerontol A Biol Sci Med Sci*. 2005;60A: 39–43.

Received April 2, 2006

Accepted August 14, 2006

Decision Editor: Luigi Ferrucci, MD, PhD

**ACADEMIC PHYSICIAN  
FACULTY APPOINTMENT IN GERIATRICS  
University of British Columbia, Faculty of Medicine  
Island Medical Program at the University of Victoria,  
BC and The Department of Medicine,  
University of British Columbia, Vancouver, BC**

The Island Medical Program (IMP), part of the distributed University of British Columbia Faculty of Medicine MD Undergraduate Program, and the UBC Department of Medicine invites applications for a full time tenure track Assistant or Associate Professor in Geriatrics. Candidates must have an FRCPC or equivalent. The successful candidate will have a record of accomplishments that demonstrates excellence in clinical practice, medical education and clinical or basic research. The successful candidate will be expected to develop an independent research program and to foster collaborative research, and to participate in the UBC MD undergraduate and postgraduate programs. The position, located in Victoria, BC will include the opportunity to provide Geriatric Medicine clinical services with the Vancouver Island Health Authority and to interact with the world class gerontology research centre at the University of Victoria. The successful candidate will be eligible for relocation and startup funding. The salary for this position will be determined by qualifications and experience, and is subject to budgetary approval.

This position is part of the Island Medical Program in Victoria, BC. The candidate must be eligible for licensing in the Province of British Columbia.

UBC and its affiliates hire on the basis of merit and are committed to employment equity. We encourage all qualified persons to apply; however, Canadians and permanent residents of Canada will be given priority.

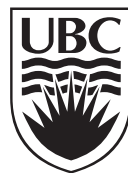

Application deadline: **July 31, 2007**, with an anticipated date of January 1, 2008. Applications including curriculum vitae, selected reprints, statement of research/clinical interests, and names of three references should be sent to: **Dr. Oscar Casiro, Associate Dean, Faculty of Medicine University of British Columbia Island Medical Program University of Victoria PO Box 1700, STN CSC, Victoria, B.C. V8W 2Y2 email: medsci@uvic.ca**
